# Supplementary material
Source: MDPI journal article supplement (https://www.mdpi.com/2072-4292/11/22/2626)
Supplement: s1 [file s1]

**Subject:** RE: [Remote Sensing] Manuscript ID: remotesensing-624550 - Assistant Editor Assigned

**From:** "Arif, Khalid" <K.Arif@massey.ac.nz>

**Date:** 2019/10/9 16:38

**To:** Vincent.Zhou <vincent.zhou@mdpi.com>

**CC:** Scott Wilson <scotty.wilson42@gmail.com>, "Potgieter, Johan" <J.Potgieter@massey.ac.nz>, Remote Sensing Editorial Office <remotesensing@mdpi.com>

Hi Vincent,

The conference paper describing our preliminary work is cited as reference [23] in the manuscript that we submitted to Remote Sensing. In the conference paper the results were from a laser scanner only while the current versions has results from two sensors, an RGB-D camera and a laser scanner. The depth of analysis is much more than the basic version presented in conference. A lot of robotics and scanning issues are discussed in detail. Similarly, scanning in sloping surfaces is included in this version only.

As per IEEE policy extended versions of conference papers can be published in journals as long the journal version is substantially different. Our paper has no issues of self-plagiarism or duplication as 1) the conference paper is already cited in the journal manuscript, 2) the journal version is substantially different and extensive compared to the conference version.

#### 229 4. Initial Testing

230 The platform's ability to capture a floor surface profile was initially tested using two 2D laser  
231 scanners. One laser scanner (mounted vertically) was used to capture the floor profile, while the other  
232 laser scanner (mounted horizontally) was used to localise the robot within the environment. The initial  
233 testing methodology and results were presented in [23].

750 23. Wilson, S.; Potgieter, J.; Arif, K. Floor surface mapping using mobile robot and 2D laser scanner.  
751 Mechatronics and Machine Vision in Practice (M2VIP), 2017 24th International Conference on. IEEE,  
752 2017, pp. 1–6.

Please let me know if you have any further questions about this issue.

Regards,

**Khalid Arif, Ph.D.**

Senior Lecturer | Postgraduate Director

Department of Mechanical and Electrical Engineering

**Massey University**

Mail: Private Bag 102904, North Shore City 0745

Physical: 229 Dairy Flat Highway (Off Kell Drive), Albany 0632

Auckland, New Zealand

Office: Albany Village (AV1.20) | Internal Ext 43580 | DDI: +64 9 213 6580 | Mobile: +64 22 350 2422

Web: <http://www.massey.ac.nz/massey/expertise/profile.cfm?stref=738250>

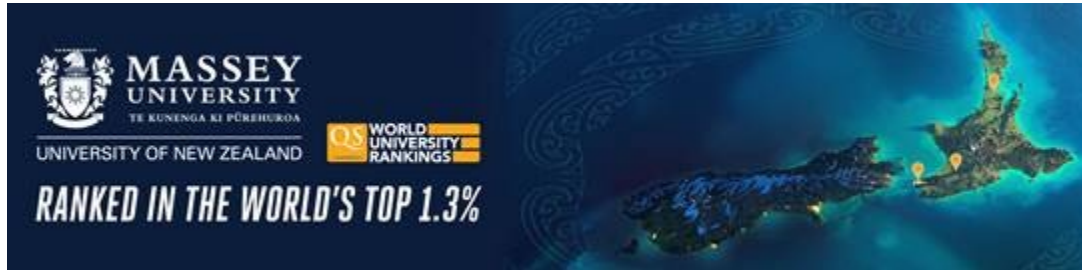

-----Original Message-----

From: Vincent.Zhou <vincent.zhou@mdpi.com>

Sent: Wednesday, October 09, 2019 8:44 PM

To: Arif, Khalid <K.Arif@massey.ac.nz>

Cc: Scott Wilson <scotty.wilson42@gmail.com>; Potgieter, Johan <J.Potgieter@massey.ac.nz>; Remote Sensing Editorial Office <remotesensing@mdpi.com>

Subject: Re: [Remote Sensing] Manuscript ID: remotesensing-624550 - Assistant Editor Assigned

Dear Dr. Arif,

We found the paper's title and some sections are same as your another article <Floor surface mapping using mobile robot and 2D laser scanner>, which was published on the IEEE, 21-23 Nov. 2017. To avoid misunderstanding, please clarify the difference between the published one and this paper with self-plagiarism and novelty issue.

If you require any further information, feel free to contact me.

I am looking forward to hearing from you.

Kind regards,

Vincent Zhou

--

Mr. Vincent Zhou
